# Supplementary material for: Association of Borderline Personality Disorder Criteria With Suicide Attempts Among US Adults
Source: PubMed Central journal article supplement (PMC8114135; doi:10.1001/jamanetworkopen.2021.9389), 2021-05-11
Supplement: jamanetwopen-e219389-s001.pdf [file jamanetwopen-e219389-s001.pdf]

## Supplementary Online Content

Grilo CM, Udo T. Association of borderline personality disorder criteria with suicide attempts among US adults. *JAMA Netw Open*. 2021;4(5):e219389. doi:10.1001/jamanetworkopen.2021.9389

**eTable 1.** Operationalization of specific criteria for *DSM-5* borderline personality disorder (BPD) for the current study

**eTable 2.** Frequency and percentage meeting specific borderline personality disorder (BPD) criteria by demographic characteristics in the total sample and by SA history

**eTable 3.** Prevalence of lifetime psychiatric disorders and childhood adversity by SA history and by specific borderline personality disorder (BPD) criteria

This supplementary material has been provided by the authors to give readers additional information about their work.

**eTable 1.** Operationalization of specific criteria for *DSM-5* Borderline Personality Disorder (BPD) for the current study.

| <b>DSM-5 Criteria</b>                                                                                                                                                                      | <b>Item number</b>                                              | <b>The AUDADIS-5 questions used in this study</b>                                                                                                                                                                                                                                                                                                                                                                                                                                    |
|--------------------------------------------------------------------------------------------------------------------------------------------------------------------------------------------|-----------------------------------------------------------------|--------------------------------------------------------------------------------------------------------------------------------------------------------------------------------------------------------------------------------------------------------------------------------------------------------------------------------------------------------------------------------------------------------------------------------------------------------------------------------------|
| <p>1) <b>Abandonment fears:</b> Frantic efforts to avoid real or imagined abandonment.</p> <p><i>Note:</i> Do not include suicidal or self-mutilating behavior covered in Criterion 5.</p> | <p>N10Q1A7</p> <p>N10Q1A8</p> <p>N10Q1A9</p> <p>N10Q1A10</p>    | <p>When you have gotten close to someone, have you needed them to reassure you that they would never leave you?</p> <p>Have you put a lot of time and effort into doing things to keep someone from leaving you?</p> <p>Have you often become frantic when you thought that someone you really cared about was going to leave you?</p> <p>Have you gone to extremes to keep people from leaving you?</p>                                                                             |
| <p>2) <b>Unstable relationships:</b> A pattern of unstable and intense interpersonal relationships characterized by alternating between extremes of idealization and devaluation</p>       | <p>N10Q1A1</p> <p>N10Q1A2</p> <p>N10Q1A3</p>                    | <p>Have you usually gotten attached to people very quickly?</p> <p>Have your relationships with people you really cared about had lots of extreme ups and downs?</p> <p>Have you often started out thinking that someone was a great person only to be disappointed when they didn't live up to your expectations?</p>                                                                                                                                                               |
| <p>3) <b>Identity disturbance:</b> Markedly and persistently unstable self-image or sense of self</p>                                                                                      | <p>N10Q1A14</p> <p>N10Q1A15</p> <p>N10Q1A16</p> <p>N10Q1A17</p> | <p>Have there been lots of sudden changes in your personal goals, career plans, religious beliefs, or other important aspects of your life?</p> <p>Have you been so different with different people or in different situations that you sometimes don't know who you really are?</p> <p>Has your sense of who you are often changed depending on the situation or whom you are with?</p> <p>Have you all of a sudden changed your sense of who you are and where you are headed?</p> |

| <b>DSM-5 Criteria</b>                                                                                                                                                                                                                                          | <b>Item number</b> | <b>The AUDADIS-5 questions used in this study</b>                                                       |
|----------------------------------------------------------------------------------------------------------------------------------------------------------------------------------------------------------------------------------------------------------------|--------------------|---------------------------------------------------------------------------------------------------------|
| <p>4) <b>Impulsivity:</b> In at least two areas that are potentially self-damaging (e.g., spending, sex, substance abuse, reckless driving, binge eating).</p> <p><i>Note:</i> Do not include suicidal or self-mutilating behavior covered in Criterion 5.</p> | N10Q1A25           | Have you gotten into sexual relationships quickly or without thinking about the consequences?           |
|                                                                                                                                                                                                                                                                | N10Q1A26           | Have there been periods of your life when you often spent too much money while shopping or gambling?    |
|                                                                                                                                                                                                                                                                | N10Q1A27           | Have you had periods in your life when you drank a lot more or used a lot more drugs than you meant to? |
|                                                                                                                                                                                                                                                                | N10Q1A28           | Have you had periods in your life when you often took too many risks when driving?                      |
|                                                                                                                                                                                                                                                                | N10Q1A29           | Have you often done things impulsively, not caring about the consequences?                              |
|                                                                                                                                                                                                                                                                | N10Q1A30           | Have you often engaged in reckless behavior without thinking about how dangerous it could be?           |
| <p>5) <b>Self-injurious behaviors:</b> recurrent suicidal behavior, gestures, or threats, or self-mutilating behavior</p>                                                                                                                                      | N10Q1A23           | When you've been under a lot of stress, have you cut, burned, or scratched yourself on purpose?         |
|                                                                                                                                                                                                                                                                | N10Q1A24           | Have you tried to hurt or kill yourself, or threatened to do so?                                        |
| <p>6) <b>Affective instability:</b> Due to a marked reactivity of mood (e.g., intense episodic dysphoria, irritability, or anxiety usually lasting a few hours and only rarely more than a few days)</p>                                                       | N10Q1A4            | Have you often become very sad, anxious or angry over little things?                                    |
|                                                                                                                                                                                                                                                                | N10Q1A5            | Have other people often wondered why you get so upset so easily?                                        |
|                                                                                                                                                                                                                                                                | N10Q1A6            | Have you had a lot of sudden mood changes?                                                              |
| <p>7) <b>Emptiness:</b> Chronic feelings of emptiness</p>                                                                                                                                                                                                      | N10Q1A18           | Have you often felt like your life had no purpose or meaning?                                           |
|                                                                                                                                                                                                                                                                | N10Q1A19           | Have you often felt empty inside?                                                                       |

| <b>DSM-5 Criteria</b>                                                                                                                                        | <b>Item number</b>   | <b>The AUDADIS-5 questions used in this study</b>                                                                                                                                                 |
|--------------------------------------------------------------------------------------------------------------------------------------------------------------|----------------------|---------------------------------------------------------------------------------------------------------------------------------------------------------------------------------------------------|
| 8) <b>Anger</b> : Inappropriate, intense anger or difficulty controlling anger (e.g., frequent displays of temper, constant anger, recurrent physical fight) | N10Q1A11             | Have you often had temper outbursts or gotten so angry that you lose control?                                                                                                                     |
|                                                                                                                                                              | N10Q1A12             | Have you hit people or thrown things when you got angry?                                                                                                                                          |
|                                                                                                                                                              | N10Q1A13             | Have even little things made you angry or have you had difficulty controlling your anger?                                                                                                         |
| 9) <b>Dissociation/paranoia</b> : Transient, stress-related paranoid ideation or severe dissociative symptoms                                                | N10Q1A20             | When you've been under a lot of stress, have you often felt that you weren't real?                                                                                                                |
|                                                                                                                                                              | N10Q1A21             | When you've been under a lot of stress, have you often felt like you were outside your body?                                                                                                      |
|                                                                                                                                                              | N10Q1A22             | When you've been under a lot of stress, have you felt suspicious or distrustful of other people?                                                                                                  |
| <b><u>Social-occupational dysfunction</u></b>                                                                                                                | N10Q1B1-<br>N10Q1B30 | <u>This question was asked each time respondent endorsed any of the above questions.</u><br><br>Did this ever trouble you or cause problems at work, school, or with your family or other people? |

**eTable 2.** Frequency and percentage meeting specific BPD criteria by demographic characteristics in the total sample and by SA history.

|                                   | Unstable Relationships |                             | Affective Instability |                | Abandonment Fears |                | Anger |                             | Identify Disturbance |                | Emptiness |                             | Dissociation/Paranoia |                             | Self-injurious Behaviors |                             | Impulsivity |                             |
|-----------------------------------|------------------------|-----------------------------|-----------------------|----------------|-------------------|----------------|-------|-----------------------------|----------------------|----------------|-----------|-----------------------------|-----------------------|-----------------------------|--------------------------|-----------------------------|-------------|-----------------------------|
|                                   | n                      | % (SE)                      | n                     | % (SE)         | n                 | % (SE)         | n     | % (SE)                      | n                    | % (SE)         | n         | % (SE)                      | n                     | % (SE)                      | n                        | % (SE)                      | n           | % (SE)                      |
| <b>Total (N = 2171)</b>           | 1853                   | 83.9<br>(0.89)              | 1882                  | 86.8<br>(0.85) | 1623              | 73.8<br>(1.25) | 1730  | 80.1<br>(0.97)              | 1476                 | 67.3<br>(1.36) | 1483      | 68.4<br>(1.22)              | 1537                  | 69.7<br>(1.34)              | 741                      | 33.8<br>(1.22)              | 182         | 84.2<br>(0.90)              |
| Sex                               |                        |                             |                       |                |                   |                |       |                             |                      |                |           |                             |                       |                             |                          |                             |             |                             |
| Men (n = 834)                     | 714                    | 82.5<br>(1.62)              | 701                   | 84.9<br>(1.46) | 623               | 74.2<br>(1.80) | 678   | 83.6<br>(1.39) <sup>†</sup> | 561                  | 67.0<br>(1.85) | 540       | 64.8<br>(2.02) <sup>†</sup> | 565                   | 67.6<br>(2.14)              | 243                      | 29.7<br>(2.07) <sup>†</sup> | 721         | 86.4<br>(1.34) <sup>†</sup> |
| Women (n = 1137)                  | 1139                   | 84.9<br>(1.17)              | 1181                  | 88.1<br>(1.24) | 1000              | 73.5<br>(1.80) | 1052  | 77.5<br>(1.52)              | 915                  | 67.6<br>(1.73) | 943       | 71.1<br>(1.47)              | 972                   | 71.2<br>(1.51)              | 498                      | 36.8<br>(1.58)              | 110         | 82.6<br>(1.17)              |
| Race or ethnicity                 |                        |                             |                       |                |                   |                |       |                             |                      |                |           |                             |                       |                             |                          |                             |             |                             |
| Non-Hispanic White (n = 1248)     | 1051                   | 83.2<br>(1.13)              | 1076                  | 86.6<br>(1.08) | 929               | 73.6<br>(1.70) | 986   | 80.0<br>(1.36)              | 839                  | 67.6<br>(1.70) | 875       | 69.5<br>(1.27)              | 851                   | 67.9<br>(1.62)              | 451                      | 34.7<br>(1.57)              | 106         | 85.0<br>(1.10)              |
| Non-Hispanic Black (n = 436)      | 376                    | 84.9<br>(2.15)              | 384                   | 86.2<br>(2.34) | 327               | 73.1<br>(2.80) | 357   | 81.1<br>(2.04)              | 311                  | 68.9<br>(3.13) | 281       | 64.6<br>(2.80)              | 335                   | 77.4<br>(2.45)<br>†         | 134                      | 29.4<br>(2.40)              | 360         | 81.9<br>(2.53)              |
| Hispanic (n = 388)                | 339                    | 85.2<br>(1.90)              | 336                   | 87.9<br>(1.83) | 287               | 74.0<br>(2.36) | 305   | 78.4<br>(2.37)              | 259                  | 67.1<br>(2.44) | 251       | 63.0<br>(2.86)              | 277                   | 71.0<br>(2.42)              | 118                      | 31.9<br>(2.88)              | 320         | 80.6<br>(2.61)              |
| Other <sup>1</sup> (n = 99)       | 87                     | 88.4<br>(3.87)              | 86                    | 87.8<br>(3.48) | 80                | 76.8<br>(4.63) | 82    | 82.5<br>(4.72)              | 67                   | 61.2<br>(5.96) | 76        | 77.0<br>(4.60) <sup>†</sup> | 74                    | 73.1<br>(5.21)              | 38                       | 36.8<br>(4.64)              | 85          | 87.0<br>(3.41)              |
| Age (years)                       |                        |                             |                       |                |                   |                |       |                             |                      |                |           |                             |                       |                             |                          |                             |             |                             |
| 18-29 (n = 553)                   | 486                    | 88.3<br>(1.67)              | 491                   | 88.8<br>(1.75) | 421               | 73.1<br>(3.02) | 448   | 81.2<br>(1.97)              | 365                  | 66.4<br>(2.40) | 351       | 64.7<br>(2.88)              | 370                   | 67.9<br>(2.92)              | 206                      | 39.5<br>(2.77) <sup>†</sup> | 468         | 85.0<br>(1.79)              |
| 30-44 (n = 669)                   | 598                    | 83.9<br>(1.30)              | 613                   | 87.5<br>(1.54) | 518               | 74.4<br>(1.96) | 574   | 83.2<br>(1.64)              | 469                  | 65.0<br>(2.39) | 471       | 67.9<br>(1.90)              | 499                   | 68.4<br>(2.07)              | 230                      | 31.6<br>(1.75)              | 599         | 85.0<br>(1.44)              |
| 45-59 (n = 662)                   | 560                    | 82.8<br>(1.70)              | 566                   | 86.2<br>(1.56) | 498               | 74.3<br>(2.11) | 509   | 77.9<br>(1.77)              | 463                  | 68.3<br>(2.50) | 478       | 71.8<br>(2.39)              | 486                   | 72.6<br>(2.08)              | 241                      | 35.2<br>(2.14)              | 553         | 84.1<br>(1.47)              |
| ≥ 60 (n = 257)                    | 209                    | 77.3<br>(3.24) <sup>†</sup> | 212                   | 81.8<br>(2.70) | 186               | 72.4<br>(3.14) | 199   | 75.4<br>(3.33)              | 179                  | 72.6<br>(3.25) | 183       | 69.6<br>(2.84)              | 182                   | 69.1<br>(2.79)              | 64                       | 23.4<br>(2.98)              | 207         | 80.9<br>(2.84)              |
| Education level                   |                        |                             |                       |                |                   |                |       |                             |                      |                |           |                             |                       |                             |                          |                             |             |                             |
| Less than high school (n = 363)   | 314                    | 82.7<br>(2.70)              | 320                   | 87.4<br>(2.19) | 281               | 73.6<br>(2.99) | 303   | 84.1<br>(2.08)              | 257                  | 71.1<br>(3.20) | 266       | 74.2<br>(2.72)              | 282                   | 78.8<br>(2.77) <sup>†</sup> | 142                      | 41.5<br>(2.99) <sup>†</sup> | 304         | 83.7<br>(2.40)              |
| High school or GED (n = 699)      | 595                    | 85.0<br>(1.74)              | 614                   | 88.0<br>(1.38) | 531               | 74.8<br>(2.00) | 575   | 82.9<br>(1.74)              | 477                  | 65.9<br>(2.30) | 494       | 68.8<br>(2.29)              | 503                   | 70.0<br>(2.02)              | 237                      | 32.9<br>(2.29)              | 571         | 81.4<br>(1.76)              |
| Some college or higher (n = 1109) | 944                    | 83.7<br>(1.25)              | 948                   | 85.8<br>(1.28) | 811               | 73.2<br>(1.72) | 852   | 76.9<br>(1.51) <sup>†</sup> | 742                  | 67.0<br>(1.91) | 723       | 66.3<br>(1.63)              | 752                   | 66.5<br>(1.97)              | 362                      | 31.9<br>(1.65)              | 952         | 86.2<br>(1.13)              |

|                                 | Unstable Relationships |                | Affective Instability |                | Abandonment Fears |                | Anger |                             | Identify Disturbance |                | Emptiness |                             | Dissociation/Paranoia |                | Self-injurious Behaviors |                             | Impulsivity |                             |
|---------------------------------|------------------------|----------------|-----------------------|----------------|-------------------|----------------|-------|-----------------------------|----------------------|----------------|-----------|-----------------------------|-----------------------|----------------|--------------------------|-----------------------------|-------------|-----------------------------|
|                                 | n                      | % (SE)         | n                     | % (SE)         | n                 | % (SE)         | n     | % (SE)                      | n                    | % (SE)         | n         | % (SE)                      | n                     | % (SE)         | n                        | % (SE)                      | n           | % (SE)                      |
| Income level                    |                        |                |                       |                |                   |                |       |                             |                      |                |           |                             |                       |                |                          |                             |             |                             |
| <\$25,000 (n = 930)             | 799                    | 85.6<br>(1.39) | 798                   | 85.5<br>(1.56) | 710               | 75.3<br>(1.65) | 751   | 81.8<br>(1.58)              | 650                  | 68.1<br>(2.07) | 675       | 72.2<br>(2.16) <sup>†</sup> | 684                   | 72.2<br>(2.10) | 366                      | 39.5<br>(2.20) <sup>‡</sup> | 789         | 85.4<br>(1.36)              |
| \$25,000-39,999<br>(n = 514)    | 447                    | 84.8<br>(1.91) | 457                   | 88.5<br>(1.72) | 392               | 76.3<br>(2.46) | 399   | 76.9<br>(2.15)              | 362                  | 70.4<br>(2.47) | 358       | 70.8<br>(2.49)              | 356                   | 70.8<br>(2.41) | 185                      | 37.2<br>(2.51)              | 423         | 81.4<br>(1.98)              |
| \$40,000-69,999<br>(n = 481)    | 407                    | 83.0<br>(2.05) | 421                   | 88.6<br>(1.67) | 348               | 72.5<br>(2.70) | 385   | 80.1<br>(2.32)              | 314                  | 66.0<br>(2.72) | 300       | 64.1<br>(2.51)              | 331                   | 66.8<br>(2.60) | 132                      | 27.1<br>(2.36)              | 393         | 81.3<br>(1.82)              |
| ≥\$70,000 (n = 246)             | 200                    | 80.4<br>(2.71) | 206                   | 84.1<br>(2.26) | 173               | 68.8<br>(31.7) | 195   | 80.5<br>(2.89)              | 150                  | 63.2<br>(3.10) | 150       | 63.7<br>(3.49)              | 166                   | 67.0<br>(3.20) | 58                       | 26.7<br>(2.98)              | 222         | 90.3<br>(2.10) <sup>‡</sup> |
| <b>With SA History</b>          |                        |                |                       |                |                   |                |       |                             |                      |                |           |                             |                       |                |                          |                             |             |                             |
| Sex                             |                        |                |                       |                |                   |                |       |                             |                      |                |           |                             |                       |                |                          |                             |             |                             |
| Men (n = 217)                   | 187                    | 84.8<br>(2.40) | 180                   | 83.9<br>(2.98) | 161               | 76.4<br>(3.43) | 175   | 81.9<br>(2.74)              | 155                  | 69.2<br>(3.84) | 169       | 76.0<br>(3.77)              | 154                   | 69.8<br>(3.83) | 170                      | 80.7<br>(3.85)              | 195         | 90.9<br>(2.34)              |
| Women (n = 453)                 | 376                    | 83.4<br>(2.46) | 405                   | 89.6<br>(1.95) | 332               | 74.4<br>(2.84) | 356   | 78.9<br>(2.40)              | 312                  | 67.9<br>(2.72) | 359       | 79.8<br>(2.49)              | 336                   | 72.8<br>(2.61) | 355                      | 79.3<br>(2.49)              | 392         | 86.3<br>(2.06)              |
| Race or ethnicity               |                        |                |                       |                |                   |                |       |                             |                      |                |           |                             |                       |                |                          |                             |             |                             |
| Non-Hispanic White<br>(n = 393) | 334                    | 85.3<br>(2.17) | 344                   | 88.3<br>(1.73) | 299               | 77.4<br>(2.60) | 315   | 81.8<br>(2.21)              | 273                  | 69.0<br>(2.59) | 317       | 79.5<br>(2.44)              | 277                   | 70.0<br>(2.71) | 320                      | 81.7<br>(2.57)              | 345         | 87.3<br>(2.03)              |
| Non-Hispanic Black<br>(n = 125) | 101                    | 80.0<br>(4.69) | 110                   | 82.6<br>(6.69) | 86                | 67.5<br>(6.47) | 97    | 75.9<br>(4.52)              | 92                   | 69.1<br>(6.89) | 96        | 76.0<br>(5.31)              | 99                    | 79.4<br>(4.62) | 90                       | 69.6<br>(5.55)              | 103         | 86.1<br>(3.67)              |
| Hispanic (n = 111)              | 95                     | 81.9<br>(4.58) | 95                    | 88.5<br>(3.41) | 79                | 73.1<br>(4.04) | 86    | 75.1<br>(5.11)              | 74                   | 67.3<br>(5.95) | 81        | 72.4<br>(3.79)              | 82                    | 72.8<br>(4.41) | 85                       | 81.0<br>(3.85)              | 101         | 90.3<br>(3.82)              |
| Other <sup>1</sup> (n = 41)     | 33                     | 78.9<br>(7.82) | 36                    | 86.2<br>(7.02) | 29                | 67.5<br>(9.42) | 33    | 76.3<br>(8.46)              | 28                   | 62.5<br>(9.02) | 34        | 82.8<br>(7.51)              | 32                    | 75.6<br>(7.52) | 30                       | 74.5<br>(8.74)              | 38          | 93.2<br>(4.38)              |
| Age (years)                     |                        |                |                       |                |                   |                |       |                             |                      |                |           |                             |                       |                |                          |                             |             |                             |
| 18-29 (n = 163)                 | 139                    | 85.5<br>(3.42) | 146                   | 88.0<br>(3.79) | 123               | 74.5<br>(4.96) | 132   | 82.3<br>(3.68)              | 111                  | 67.4<br>(4.53) | 126       | 79.2<br>(3.65)              | 110                   | 70.9<br>(4.31) | 137                      | 86.3<br>(2.85)              | 149         | 91.8<br>(2.69)              |
| 30-44 (n = 230)                 | 191                    | 84.6<br>(2.37) | 202                   | 88.6<br>(2.22) | 165               | 75.5<br>(3.67) | 191   | 83.4<br>(2.91)              | 160                  | 68.0<br>(4.61) | 175       | 73.9<br>(3.15)              | 167                   | 68.3<br>(3.79) | 175                      | 75.8<br>(4.01)              | 201         | 88.4<br>(2.85)              |
| 45-59 (n = 224)                 | 184                    | 80.5<br>(3.16) | 196                   | 88.0<br>(2.12) | 168               | 76.5<br>(4.00) | 171   | 78.6<br>(3.07)              | 160                  | 69.3<br>(4.38) | 187       | 83.8<br>(3.21)              | 175                   | 77.7<br>(2.63) | 175                      | 79.6<br>(3.16)              | 189         | 84.4<br>(2.84)              |
| ≥ 60 (n = 53)                   | 49                     | 89.5<br>(5.94) | 41                    | 79.8<br>(5.81) | 37                | 70.2<br>(7.56) | 37    | 63.4<br>(7.39) <sup>†</sup> | 36                   | 69.4<br>(7.86) | 40        | 72.5<br>(7.35)              | 38                    | 64.0<br>(7.85) | 38                       | 74.5<br>(7.39)              | 48          | 86.5<br>(5.90)              |

|                                  | Unstable Relationships |                          | Affective Instability |             | Abandonment Fears |             | Anger |                          | Identify Disturbance |             | Emptiness |                          | Dissociation/Paranoia |                          | Self-injurious Behaviors |             | Impulsivity |             |
|----------------------------------|------------------------|--------------------------|-----------------------|-------------|-------------------|-------------|-------|--------------------------|----------------------|-------------|-----------|--------------------------|-----------------------|--------------------------|--------------------------|-------------|-------------|-------------|
|                                  | n                      | % (SE)                   | n                     | % (SE)      | n                 | % (SE)      | n     | % (SE)                   | n                    | % (SE)      | n         | % (SE)                   | n                     | % (SE)                   | n                        | % (SE)      | n           | % (SE)      |
| <b>Education level</b>           |                        |                          |                       |             |                   |             |       |                          |                      |             |           |                          |                       |                          |                          |             |             |             |
| Less than high school (n = 128)  | 109                    | 84.1 (4.61)              | 117                   | 91.2 (4.13) | 92                | 66.9 (5.85) | 111   | 89.4 (3.14)              | 94                   | 70.7 (5.57) | 104       | 82.2 (4.37)              | 102                   | 77.5 (4.83) <sup>†</sup> | 104                      | 84.3 (3.97) | 112         | 88.4 (3.56) |
| High school or GED (n = 205)     | 174                    | 84.6 (3.43)              | 186                   | 90.5 (2.29) | 153               | 75.6 (3.56) | 171   | 82.2 (3.32)              | 150                  | 69.3 (3.11) | 166       | 79.9 (3.15)              | 163                   | 77.1 (2.93)              | 165                      | 80.4 (3.23) | 173         | 85.4 (3.29) |
| Some college or higher (n = 337) | 280                    | 83.4 (2.39)              | 282                   | 84.2 (2.21) | 248               | 73.2 (1.72) | 249   | 74.9 (2.84) <sup>†</sup> | 223                  | 66.8 (3.61) | 258       | 76.1 (3.22)              | 225                   | 66.0 (3.11)              | 256                      | 77.7 (2.87) | 302         | 89.4 (1.89) |
| <b>Income level</b>              |                        |                          |                       |             |                   |             |       |                          |                      |             |           |                          |                       |                          |                          |             |             |             |
| <\$25,000 (n = 347)              | 298                    | 87.3 (1.99)              | 302                   | 86.7 (2.18) | 257               | 74.0 (3.29) | 287   | 84.0 (2.31)              | 249                  | 70.0 (3.43) | 278       | 80.8 (2.43)              | 262                   | 74.3 (3.38)              | 282                      | 82.1 (2.91) | 300         | 87.6 (2.50) |
| \$25,000-39,999 (n = 151)        | 126                    | 83.7 (3.29)              | 132                   | 88.7 (3.23) | 114               | 79.5 (4.26) | 111   | 75.5 (3.93)              | 106                  | 66.5 (4.22) | 123       | 80.5 (3.56)              | 105                   | 68.6 (4.43)              | 115                      | 80.2 (3.95) | 137         | 89.7 (2.66) |
| \$40,000-69,999 (n = 116)        | 93                     | 79.2 (4.66)              | 102                   | 90.3 (2.57) | 82                | 73.5 (4.82) | 89    | 77.7 (4.09)              | 73                   | 64.9 (4.97) | 85        | 72.2 (4.60)              | 83                    | 71.2 (5.06)              | 87                       | 76.2 (3.68) | 98          | 83.2 (4.41) |
| ≥\$70,000 (n = 56)               | 46                     | 80.1 (6.05)              | 49                    | 84.3 (5.61) | 40                | 73.4 (6.14) | 44    | 78.1 (5.38)              | 39                   | 71.5 (6.21) | 42        | 76.4 (5.46)              | 40                    | 69.8 (6.61)              | 41                       | 76.9 (5.87) | 52          | 93.0 (3.75) |
| <b><u>Without SA History</u></b> |                        |                          |                       |             |                   |             |       |                          |                      |             |           |                          |                       |                          |                          |             |             |             |
| <b>Sex</b>                       |                        |                          |                       |             |                   |             |       |                          |                      |             |           |                          |                       |                          |                          |             |             |             |
| Men (n = 617)                    | 524                    | 82.0 (1.94)              | 517                   | 85.2 (1.77) | 459               | 73.6 (2.16) | 498   | 84.1 (1.49) <sup>†</sup> | 402                  | 66.0 (2.30) | 367       | 60.7 (2.26) <sup>†</sup> | 408                   | 66.9 (2.52)              | 73                       | 12.1 (1.62) | 521         | 84.7 (1.57) |
| Women (n = 884)                  | 759                    | 85.7 (1.29)              | 773                   | 87.4 (1.60) | 665               | 73.0 (1.99) | 693   | 76.7 (2.00)              | 599                  | 67.4 (2.15) | 581       | 66.7 (2.00)              | 632                   | 70.3 (1.77)              | 141                      | 15.1 (1.42) | 711         | 80.7 (1.48) |
| <b>Race or ethnicity</b>         |                        |                          |                       |             |                   |             |       |                          |                      |             |           |                          |                       |                          |                          |             |             |             |
| Non-Hispanic White (n = 855)     | 715                    | 82.3 (1.41)              | 729                   | 85.8 (1.29) | 628               | 72.0 (1.88) | 668   | 79.2 (1.69)              | 563                  | 66.8 (2.04) | 555       | 65.0 (1.94)              | 572                   | 67.0 (1.91)              | 130                      | 14.0 (1.55) | 714         | 84.0 (1.34) |
| Non-Hispanic Black (n = 311)     | 272                    | 87.1 (2.43)              | 271                   | 87.8 (2.21) | 238               | 75.3 (3.13) | 257   | 83.3 (2.39)              | 215                  | 68.4 (3.46) | 182       | 60.0 (3.54)              | 233                   | 76.6 (2.95)              | 43                       | 13.1 (1.81) | 254         | 80.3 (2.81) |
| Hispanic (n = 277)               | 243                    | 86.5 (2.14)              | 240                   | 87.6 (2.37) | 207               | 74.2 (2.48) | 218   | 79.7 (2.61)              | 184                  | 66.9 (2.90) | 170       | 59.5 (3.49)              | 194                   | 70.2 (3.26)              | 33                       | 12.9 (2.38) | 218         | 76.8 (3.33) |
| Other <sup>1</sup> (n = 58)      | 53                     | 94.1 (3.10) <sup>†</sup> | 50                    | 89.7 (3.94) | 51                | 83.3 (6.25) | 48    | 81.2 (4.92)              | 39                   | 61.0 (8.69) | 41        | 73.2 (5.71)              | 41                    | 71.2 (7.11)              | 8                        | 13.9 (7.84) | 46          | 83.1 (4.43) |
|                                  |                        |                          |                       |             |                   |             |       |                          |                      |             |           |                          |                       |                          |                          |             |             |             |
|                                  |                        |                          |                       |             |                   |             |       |                          |                      |             |           |                          |                       |                          |                          |             |             |             |
|                                  |                        |                          |                       |             |                   |             |       |                          |                      |             |           |                          |                       |                          |                          |             |             |             |

|                                  | Unstable Relationships |                             | Affective Instability |                | Abandonment Fears |                | Anger |                | Identify Disturbance |                | Emptiness |                | Dissociation/Paranoia |                             | Self-injurious Behaviors |                             | Impulsivity |                             |
|----------------------------------|------------------------|-----------------------------|-----------------------|----------------|-------------------|----------------|-------|----------------|----------------------|----------------|-----------|----------------|-----------------------|-----------------------------|--------------------------|-----------------------------|-------------|-----------------------------|
|                                  | n                      | % (SE)                      | n                     | % (SE)         | n                 | % (SE)         | n     | % (SE)         | n                    | % (SE)         | n         | % (SE)         | n                     | % (SE)                      | n                        | % (SE)                      | n           | % (SE)                      |
| Age (years)                      |                        |                             |                       |                |                   |                |       |                |                      |                |           |                |                       |                             |                          |                             |             |                             |
| 18-29 (n = 390)                  | 346                    | 89.5<br>(1.91)              | 344                   | 89.2<br>(2.11) | 297               | 72.4<br>(3.13) | 315   | 80.7<br>(2.41) | 253                  | 65.9<br>(2.84) | 225       | 58.3<br>(3.51) | 259                   | 66.4<br>(3.57)              | 69                       | 18.4<br>(2.79) <sup>†</sup> | 318         | 81.8<br>(2.18)              |
| 30-44 (n = 469)                  | 402                    | 83.6<br>(1.72)              | 406                   | 87.1<br>(2.03) | 349               | 74.2<br>(2.27) | 377   | 82.9<br>(1.89) | 304                  | 63.4<br>(2.63) | 291       | 64.7<br>(2.39) | 327                   | 68.4<br>(2.37)              | 54                       | 10.1<br>(1.44)              | 392         | 81.2<br>(1.57)              |
| 45-59 (n = 438)                  | 375                    | 83.9<br>(2.29)              | 370                   | 85.5<br>(2.00) | 330               | 73.4<br>(2.45) | 338   | 77.6<br>(2.42) | 302                  | 67.8<br>(2.71) | 290       | 66.1<br>(2.80) | 310                   | 70.2<br>(2.84)              | 65                       | 14.4<br>(1.92)              | 364         | 84.0<br>(1.88)              |
| ≥ 60 (n = 204)                   | 160                    | 74.9<br>(3.64) <sup>‡</sup> | 170                   | 82.1<br>(3.20) | 148               | 72.7<br>(3.49) | 161   | 78.1<br>(3.91) | 142                  | 73.2<br>(3.45) | 142       | 68.7<br>(2.94) | 144                   | 70.9<br>(3.27)              | 26                       | 11.1<br>(2.60)              | 158         | 79.4<br>(2.88)              |
| Education level                  |                        |                             |                       |                |                   |                |       |                |                      |                |           |                |                       |                             |                          |                             |             |                             |
| Less than high school (n = 235)  | 202                    | 81.9<br>(3.18)              | 201                   | 85.7<br>(3.01) | 188               | 78.2<br>(3.75) | 189   | 81.1<br>(2.81) | 160                  | 71.1<br>(3.22) | 158       | 69.4<br>(3.79) | 177                   | 79.5<br>(3.30) <sup>†</sup> | 37                       | 18.3<br>(2.61)              | 189         | 81.1<br>(2.92)              |
| High school or GED (n = 494)     | 418                    | 85.1<br>(2.07)              | 425                   | 86.9<br>(1.70) | 375               | 74.4<br>(2.28) | 401   | 83.1<br>(1.97) | 324                  | 64.4<br>(2.95) | 326       | 64.3<br>(2.71) | 337                   | 66.9<br>(2.54)              | 71                       | 13.3<br>(1.89)              | 395         | 79.7<br>(1.84)              |
| Some college or higher (n = 772) | 663                    | 83.9<br>(1.45)              | 664                   | 86.4<br>(1.57) | 561               | 71.1<br>(2.08) | 601   | 77.7<br>(1.97) | 517                  | 67.0<br>(2.26) | 464       | 62.2<br>(1.97) | 526                   | 66.8<br>(2.15)              | 106                      | 12.8<br>(1.51)              | 648         | 84.8<br>(1.42)              |
| Income level                     |                        |                             |                       |                |                   |                |       |                |                      |                |           |                |                       |                             |                          |                             |             |                             |
| <\$25,000 (n = 583)              | 496                    | 84.4<br>(1.81)              | 493                   | 85.0<br>(2.02) | 450               | 76.2<br>(1.79) | 460   | 80.5<br>(2.08) | 397                  | 66.9<br>(2.44) | 394       | 67.1<br>(3.25) | 417                   | 70.7<br>(2.93)              | 83                       | 14.2<br>(1.70)              | 485         | 84.1<br>(1.53) <sup>‡</sup> |
| \$25,000-39,999 (n = 363)        | 319                    | 85.8<br>(2.14)              | 321                   | 88.3<br>(1.92) | 275               | 75.0<br>(2.95) | 284   | 77.3<br>(2.62) | 252                  | 71.9<br>(2.80) | 231       | 66.0<br>(3.03) | 249                   | 72.2<br>(2.84)              | 69                       | 18.1<br>(2.73)              | 282         | 77.4<br>(2.35)              |
| \$40,000-69,999 (n = 365)        | 314                    | 84.2<br>(2.17)              | 319                   | 88.1<br>(1.91) | 266               | 72.1<br>(2.86) | 296   | 80.9<br>(2.84) | 241                  | 66.3<br>(2.94) | 215       | 61.5<br>(2.82) | 248                   | 65.4<br>(3.02)              | 45                       | 11.8<br>(1.82)              | 295         | 80.7<br>(2.18)              |
| ≥\$70,000 (n = 190)              | 154                    | 80.5<br>(3.10)              | 157                   | 84.0<br>(2.44) | 133               | 67.3<br>(4.08) | 151   | 81.3<br>(3.37) | 111                  | 60.5<br>(3.79) | 108       | 59.5<br>(4.09) | 126                   | 66.1<br>(3.60)              | 17                       | 10.5<br>(3.17)              | 170         | 89.4<br>(2.33)              |

Notes. All analyses were adjusted for the NESARC complex survey design. <sup>1</sup> = Other included Asian, Native Hawaiian, or other Pacific Islander, and Native American. <sup>†</sup> = significantly different between respondents reporting a specific criterion and who did not at  $p < .05$ ; <sup>‡</sup> = significantly different between respondents reporting a specific criterion and who did not at  $p < .01$ .



**eTable 3.** Prevalence of lifetime psychiatric disorders and childhood adversity by lifetime SA history and by specific BPD criteria.

|                              | With lifetime SA History  |                          |                                    |             | Without lifetime SA History |                          |                                    |             |
|------------------------------|---------------------------|--------------------------|------------------------------------|-------------|-----------------------------|--------------------------|------------------------------------|-------------|
|                              | Met specific BPD criteria |                          | Did not meet specific BPD criteria |             | Met specific BPD criteria   |                          | Did not meet specific BPD criteria |             |
|                              | n/N                       | % (SE)                   | n/N                                | % (SE)      | n/N                         | % (SE)                   | n/N                                | % (SE)      |
| <b>Any anxiety disorders</b> |                           |                          |                                    |             |                             |                          |                                    |             |
| Unstable Relationship        | 395/563                   | 71.1 (2.25)              | 67/107                             | 62.6 (5.19) | 721/1283                    | 59.3 (1.52)              | 121/218                            | 57.9 (3.68) |
| Affective Instability        | 415/585                   | 72.2 (2.32) <sup>†</sup> | 47/85                              | 52.3 (6.70) | 738/1290                    | 60.4 (1.73) <sup>†</sup> | 104/211                            | 50.2 (4.06) |
| Abandonment Fear             | 351/493                   | 71.1 (2.36)              | 111/177                            | 65.6 (4.30) | 631/1124                    | 59.0 (1.63)              | 211/377                            | 59.0 (3.33) |
| Anger                        | 367/531                   | 69.2 (2.47)              | 95/139                             | 71.7 (4.52) | 664/1191                    | 58.1 (1.65)              | 178/310                            | 62.6 (3.43) |
| Identity Disturbance         | 337/467                   | 74.8 (2.33) <sup>†</sup> | 125/203                            | 58.8 (4.38) | 589/1001                    | 61.4 (1.74) <sup>†</sup> | 253/500                            | 54.3 (2.60) |
| Emptiness                    | 378/528                   | 71.5 (2.39)              | 84/142                             | 63.3 (4.55) | 566/948                     | 62.2 (2.05) <sup>†</sup> | 276/533                            | 53.3 (2.49) |
| Dissociation/Paranoia        | 359/490                   | 73.5 (2.29) <sup>†</sup> | 103/180                            | 60.2 (4.18) | 619/1040                    | 62.5 (1.87) <sup>†</sup> | 223/461                            | 51.4 (2.76) |
| Self-injurious Behavior      | 95/145                    | 65.3 (4.85)              | 367/525                            | 70.9 (2.33) | 124/214                     | 61.1 (3.94)              | 718/1287                           | 58.7 (1.61) |
| Impulsivity                  | 411/587                   | 70.4 (2.18)              | 51/83                              | 64.7 (7.01) | 688/1232                    | 59.5 (1.59)              | 154/269                            | 56.7 (3.31) |
| <b>Any mood disorders</b>    |                           |                          |                                    |             |                             |                          |                                    |             |
| Unstable Relationship        | 480/563                   | 87.1 (1.69)              | 93/107                             | 88.3 (3.92) | 397/886                     | 71.1 (1.61)              | 156/218                            | 70.5 (4.05) |
| Affective Instability        | 504/585                   | 87.9 (1.49)              | 69/85                              | 82.6 (6.07) | 904/1290                    | 72.1 (1.66)              | 138/211                            | 63.9 (3.90) |
| Abandonment Fear             | 431/493                   | 89.7 (1.46) <sup>†</sup> | 142/177                            | 79.9 (3.83) | 770/1124                    | 69.9 (1.69)              | 272/377                            | 74.1 (2.65) |
| Anger                        | 448/531                   | 85.9 (1.88) <sup>†</sup> | 125/139                            | 93.0 (2.17) | 823/1191                    | 70.4 (1.66)              | 219/310                            | 73.6 (2.67) |
| Identity Disturbance         | 402/467                   | 88.7 (1.61)              | 171/203                            | 84.2 (3.31) | 707/1001                    | 72.5 (1.65)              | 335/500                            | 68.0 (2.54) |
| Emptiness                    | 462/528                   | 88.2 (1.78)              | 111/142                            | 83.4 (3.41) | 704/948                     | 76.6 (1.78) <sup>†</sup> | 338/553                            | 61.2 (2.28) |
| Dissociation/Paranoia        | 424/490                   | 88.4 (1.85)              | 149/180                            | 84.4 (3.36) | 752/1040                    | 73.1 (1.69) <sup>†</sup> | 290/461                            | 66.4 (2.62) |
| Self-injurious Behavior      | 449/525                   | 87.0 (1.78)              | 124/145                            | 88.5 (2.96) | 160/214                     | 74.5 (3.34)              | 882/1287                           | 70.5 (1.51) |
| Impulsivity                  | 502/587                   | 87.4 (1.72)              | 71/83                              | 86.4 (3.79) | 869/1232                    | 72.2 (1.63)              | 173/269                            | 65.7 (3.29) |
| <b>PTSD</b>                  |                           |                          |                                    |             |                             |                          |                                    |             |
| Unstable Relationship        | 293/563                   | 44.2 (2.41)              | 48/107                             | 47.5 (5.87) | 441/1283                    | 32.8 (1.63)              | 69/218                             | 27.4 (3.44) |
| Affective Instability        | 309/585                   | 54.8 (2.76) <sup>†</sup> | 32/85                              | 31.0 (6.23) | 454/1290                    | 33.3 (1.56) <sup>†</sup> | 56/211                             | 22.8 (3.53) |
| Abandonment Fear             | 264/493                   | 54.6 (2.56) <sup>†</sup> | 77/177                             | 43.3 (5.04) | 388/1124                    | 33.1 (1.60)              | 122/377                            | 28.7 (3.02) |
| Anger                        | 268/531                   | 51.0 (2.90)              | 73/139                             | 55.0 (6.04) | 410/1191                    | 32.3 (1.71)              | 100/310                            | 30.4 (2.88) |

| Identity Disturbances                   | 256/467                   | 56.9 (31.2) <sup>†</sup> | 85/203                             | 40.9 (5.00) | 356/1001                    | 33.5 (1.83)              | 154/500                            | 28.6 (2.13) |
|-----------------------------------------|---------------------------|--------------------------|------------------------------------|-------------|-----------------------------|--------------------------|------------------------------------|-------------|
|                                         | With lifetime SA History  |                          |                                    |             | Without lifetime SA History |                          |                                    |             |
|                                         | Met specific BPD criteria |                          | Did not meet specific BPD criteria |             | Met specific BPD criteria   |                          | Did not meet specific BPD criteria |             |
|                                         | n/N                       | % (SE)                   | n/N                                | % (SE)      | n/N                         | % (SE)                   | n/N                                | % (SE)      |
| Emptiness                               | 287/528                   | 55.7 (2.76) <sup>†</sup> | 54/142                             | 37.5 (4.65) | 351/948                     | 35.2 (1.84) <sup>†</sup> | 159/553                            | 26.0 (2.19) |
| Dissociation/Paranoia                   | 271/490                   | 56.6 (30.5) <sup>†</sup> | 70/180                             | 39.7 (3.97) | 405/1040                    | 37.3 (1.64) <sup>†</sup> | 105/461                            | 20.0 (2.01) |
| Self-injurious Behavior                 | 286/525                   | 55.2 (2.85) <sup>†</sup> | 55/145                             | 38.2 (5.33) | 86/214                      | 40.4 (4.54) <sup>†</sup> | 424/1287                           | 30.5 (1.49) |
| Impulsivity                             | 306/587                   | 52.7 (2.66)              | 35/83                              | 45.5 (8.35) | 432/1232                    | 32.4 (1.54)              | 78/269                             | 29.5 (2.93) |
| <b>Any substance use disorder</b>       |                           |                          |                                    |             |                             |                          |                                    |             |
| Unstable Relationship                   | 484/563                   | 87.0 (1.81)              | 82/107                             | 83.6 (3.06) | 968/1283                    | 76.6 (1.32)              | 176/218                            | 83.0 (2.95) |
| Affective Instability                   | 493/585                   | 85.6 (1.66) <sup>†</sup> | 73/85                              | 92.7 (1.90) | 974/1290                    | 76.9 (1.29)              | 170/211                            | 82.2 (3.34) |
| Abandonment Fear                        | 427/493                   | 87.9 (1.84)              | 139/177                            | 82.1 (3.60) | 865/1124                    | 78.7 (1.40)              | 279/377                            | 74.9 (2.48) |
| Anger                                   | 459/531                   | 87.9 (1.90)              | 1074/139                           | 80.7 (3.81) | 928/1191                    | 78.9 (1.38) <sup>†</sup> | 216/310                            | 72.8 (2.71) |
| Identity Disturbance                    | 396/467                   | 86.5 (1.80)              | 170/203                            | 86.3 (3.08) | 765/1001                    | 79.1 (1.36)              | 379/500                            | 74.8 (2.30) |
| Emptiness                               | 448/528                   | 86.6 (1.58)              | 118/142                            | 86.0 (3.76) | 709/948                     | 77.0 (1.53)              | 435/553                            | 78.9 (1.97) |
| Dissociation/Paranoia                   | 406/490                   | 84.4 (1.75) <sup>†</sup> | 160/180                            | 91.7 (2.29) | 780/1040                    | 75.9 (1.63) <sup>†</sup> | 364/461                            | 81.5 (1.97) |
| Self-injurious Behavior                 | 448/525                   | 86.6 (1.58)              | 118/145                            | 85.7 (3.57) | 174/214                     | 81.7 (3.36)              | 970/1287                           | 77.0 (1.30) |
| Impulsivity                             | 511/587                   | 88.8 (1.54) <sup>†</sup> | 55/83                              | 69.4 (6.53) | 994/1232                    | 82.3 (1.34) <sup>†</sup> | 150/269                            | 55.6 (3.63) |
| <b>Schizotypal personality disorder</b> |                           |                          |                                    |             |                             |                          |                                    |             |
| Unstable Relationship                   | 352/563                   | 62.5 (2.88) <sup>†</sup> | 53/107                             | 40.3 (4.69) | 647/1283                    | 50.4 (1.72)              | 112/218                            | 51.6 (4.06) |
| Affective Instability                   | 363/585                   | 61.2 (2.75) <sup>†</sup> | 42/85                              | 42.9 (6.61) | 666/1290                    | 51.8 (1.65) <sup>†</sup> | 93/211                             | 42.7 (4.05) |
| Abandonment Fear                        | 316/493                   | 32.8 (3.00) <sup>†</sup> | 89/177                             | 47.4 (4.56) | 571/1124                    | 50.3 (1.73)              | 188/377                            | 51.2 (3.45) |
| Anger                                   | 341/531                   | 62.1 (2.87) <sup>†</sup> | 64/139                             | 46.5 (5.40) | 607/1191                    | 51.3 (1.71)              | 152/310                            | 47.7 (3.44) |
| Identity Disturbance                    | 313/467                   | 65.6 (2.93) <sup>†</sup> | 92/203                             | 44.4 (4.90) | 560/1001                    | 55.4 (1.79) <sup>†</sup> | 199/500                            | 40.8 (2.84) |
| Emptiness                               | 342/528                   | 63.0 (2.95) <sup>†</sup> | 63/142                             | 44.0 (5.33) | 528/948                     | 56.2 (1.89) <sup>†</sup> | 231/553                            | 40.5 (2.46) |
| Dissociation/Paranoia                   | 338/490                   | 69.2 (2.91) <sup>†</sup> | 67/180                             | 32.9 (4.47) | 593/1040                    | 56.8 (1.74)              | 166/461                            | 36.9 (2.91) |
| Self-injurious Behavior                 | 316/525                   | 58.8 (2.77)              | 89/145                             | 59.4 (5.20) | 125/214                     | 58.8 (4.39) <sup>†</sup> | 634/1287                           | 49.3 (1.55) |
| Impulsivity                             | 366/587                   | 61.6 (2.70) <sup>†</sup> | 39/83                              | 39.8 (7.83) | 645/1232                    | 52.0 (1.61) <sup>†</sup> | 114/269                            | 43.9 (3.67) |
| <b>Antisocial personality disorder</b>  |                           |                          |                                    |             |                             |                          |                                    |             |
| Unstable Relationship                   | 180/563                   | 35.2 (2.52)              | 23/107                             | 23.9 (5.46) | 229/1283                    | 18.8 (1.67)              | 47/218                             | 23.3 (3.55) |

|                                      |                           |                          |                                    |             |                             |                          |                                    |             |
|--------------------------------------|---------------------------|--------------------------|------------------------------------|-------------|-----------------------------|--------------------------|------------------------------------|-------------|
| Affective Instability                | 185/585                   | 34.3 (2.53)              | 18/85                              | 26.8 (7.18) | 241/1290                    | 19.2 (1.66)              | 35/211                             | 22.2 (3.42) |
| Abandonment Fear                     | 163/493                   | 35.6 (2.65)              | 40/177                             | 26.6 (4.63) | 210/1124                    | 19.6 (1.74)              | 66/377                             | 19.5 (2.67) |
|                                      | With lifetime SA History  |                          |                                    |             | Without lifetime SA History |                          |                                    |             |
|                                      | Met specific BPD criteria |                          | Did not meet specific BPD criteria |             | Met specific BPD criteria   |                          | Did not meet specific BPD criteria |             |
|                                      | n/N                       | % (SE)                   | n/N                                | % (SE)      | n/N                         | % (SE)                   | n/N                                | % (SE)      |
| Anger                                | 173/531                   | 34.7 (2.70)              | 30/139                             | 28.3 (4.51) | 255/1191                    | 22.8 (1.82) <sup>‡</sup> | 21/310                             | 6.6 (1.66)  |
| Identity Disturbance                 | 157/467                   | 37.4 (2.71) <sup>‡</sup> | 46/203                             | 24.7 (3.79) | 192/1001                    | 20.8 (1.75)              | 84/500                             | 17.0 (2.49) |
| Emptiness                            | 164/528                   | 34.6 (2.51)              | 39/142                             | 29.1 (4.85) | 170/948                     | 19.9 (1.81)              | 106/553                            | 18.9 (2.22) |
| Dissociation/Paranoia                | 154/490                   | 35.0 (2.62)              | 49/180                             | 29.4 (5.29) | 184/1040                    | 18.9 (1.80)              | 92/461                             | 21.1 (2.92) |
| Self-injurious Behavior              | 156/525                   | 34.7 (2.74)              | 47/145                             | 28.4 (3.99) | 38/214                      | 17.9 (3.07)              | 238/1287                           | 19.8 (1.63) |
| Impulsivity                          | 196/587                   | 36.7 (2.59) <sup>‡</sup> | 7/83                               | 9.2 (4.22)  | 250/1232                    | 21.5 (1.76) <sup>‡</sup> | 26/269                             | 10.3 (1.83) |
| <b>Conduct disorder</b>              |                           |                          |                                    |             |                             |                          |                                    |             |
| Unstable Relationship                | 184/563                   | 36.0 (2.48)              | 24/107                             | 24.1 (5.46) | 234/1283                    | 19.4 (1.65)              | 41/218                             | 25.4 (3.69) |
| Affective Instability                | 188/585                   | 35.0 (2.52)              | 20/85                              | 27.5 (7.16) | 247/1290                    | 20.0 (1.67)              | 36/211                             | 22.4 (3.40) |
| Abandonment Fear                     | 168/493                   | 36.5 (2.63)              | 40/177                             | 26.6 (4.63) | 217/1124                    | 20.6 (1.77)              | 66/377                             | 19.5 (2.67) |
| Anger                                | 176/531                   | 35.4 (2.68)              | 32/139                             | 28.7 (4.50) | 261/1191                    | 23.7 (1.86) <sup>‡</sup> | 22/310                             | 6.7 (1.58)  |
| Identity Disturbance                 | 161/467                   | 38.3 (2.69) <sup>‡</sup> | 47/203                             | 24.8 (3.78) | 198/1001                    | 21.8 (1.75)              | 85/500                             | 17.4 (2.50) |
| Emptiness                            | 169/528                   | 35.4 (2.54)              | 39/142                             | 29.1 (4.85) | 174/948                     | 20.2 (1.80)              | 109/553                            | 20.5 (2.22) |
| Dissociation/Paranoia                | 158/490                   | 35.8 (2.58)              | 50/180                             | 29.5 (5.30) | 181/1040                    | 19.1 (1.80)              | 97/461                             | 23.1 (2.98) |
| Self-injurious Behavior              | 159/525                   | 35.4 (2.76)              | 49/145                             | 28.9 (4.01) | 38/214                      | 17.9 (3.07)              | 245/1287                           | 20.7 (1.64) |
| Impulsivity                          | 199/587                   | 37.2 (2.57) <sup>‡</sup> | 9/83                               | 10.9 (4.37) | 254/1232                    | 21.9 (1.78) <sup>‡</sup> | 29/269                             | 12.8 (2.30) |
| <b>Childhood adverse experiences</b> |                           |                          |                                    |             |                             |                          |                                    |             |
| Unstable Relationship                | 513/563                   | 91.8 (1.26)              | 99/107                             | 92.5 (3.22) | 1088/1283                   | 82.6 (1.15)              | 182/218                            | 84.2 (2.84) |
| Affective Instability                | 538/585                   | 92.8 (1.20)              | 74/85                              | 85.4 (4.49) | 1092/1290                   | 82.5 (1.30)              | 178/211                            | 85.5 (2.83) |
| Abandonment Fear                     | 456/493                   | 92.5 (1.41)              | 156/177                            | 90.0 (2.62) | 951/1124                    | 82.6 (1.17)              | 319/377                            | 83.6 (2.21) |
| Anger                                | 491/531                   | 93.2 (1.12)              | 121/139                            | 86.5 (4.19) | 1012/1191                   | 83.3 (1.30)              | 258/310                            | 81.1 (2.94) |
| Identity Disturbance                 | 435/467                   | 93.8 (1.15) <sup>†</sup> | 177/203                            | 87.6 (2.81) | 851/1001                    | 83.9 (1.51)              | 419/500                            | 80.9 (2.00) |
| Emptiness                            | 483/528                   | 92.8 (1.06)              | 129/142                            | 88.4 (3.06) | 808/948                     | 83.6 (1.46)              | 462/553                            | 81.6 (2.20) |
| Dissociation/Paranoia                | 453/490                   | 93.1 (1.11)              | 159/180                            | 88.7 (2.47) | 878/1040                    | 81.8 (1.51)              | 392/461                            | 85.3 (2.12) |

|                         |         |                          |         |             |           |                          |           |             |
|-------------------------|---------|--------------------------|---------|-------------|-----------|--------------------------|-----------|-------------|
| Self-injurious Behavior | 478/525 | 91.3 (1.34)              | 134/145 | 94.0 (2.40) | 177/214   | 81.7 (3.41)              | 1093/1287 | 83.1 (1.28) |
| Impulsivity             | 541/587 | 92.9 (1.13) <sup>†</sup> | 71/83   | 84.2 (5.46) | 1056/1232 | 84.2 (1.24) <sup>†</sup> | 214/269   | 76.9 (2.89) |

*Notes.* All analyses were adjusted for the NESARC complex survey design. <sup>†</sup> = significantly different between respondents reporting a specific criterion and who did not at  $p < .05$ ; <sup>‡</sup> = significantly different between respondents reporting a specific criterion and who did not at  $p < .01$ .
